# Supplementary material for: Effect of pretreatment conditions on Fe-ZSM-5 properties and performance for Fischer–Tropsch synthesis
Source: Royal Society of Chemistry journal article supplement (doi:10.1039/d4cy00765d), 2024-11-27
Supplement: d4cy00765d1.pdf [file d4cy00765d1.pdf]

## Supporting Information

### Effect of pretreatment conditions on Fe-ZSM-5 properties and performance for Fischer-Tropsch synthesis

Jane N. Agwara<sup>1</sup>, Denis Leshchev<sup>2</sup>, Sinhara M.H.D. Perera<sup>1</sup>, Alexis K. Bauer<sup>3</sup>, Michael L. Neidig<sup>3</sup>, and Marc D. Porosoff<sup>1\*</sup>

<sup>1</sup>Department of Chemical Engineering, University of Rochester, Rochester, NY, 14627, USA.

<sup>2</sup>National Synchrotron Light Source II, Brookhaven National Laboratory, Upton, NY, 11973, USA.

<sup>3</sup>Inorganic Chemistry Laboratory, Department of Chemistry, University of Oxford, South Parks Road, Oxford OX1 3QR, United Kingdom.

\*Corresponding author: Prof. Marc D. Porosoff, 4405 Wegmans Hall, Phone: (+1) 585-276-7401, Email: [marc.porosoff@rochester.edu](mailto:marc.porosoff@rochester.edu)

**Table S1.** CO conversion and selectivity averaged between 9-12 hours on stream of Fe-Na-ZSM-5 pretreated in H<sub>2</sub> or CO at temperatures ranging from 300 -770 °C.

| Catalyst            | Reduction Gas  | CO Conversion (%) | Selectivity (%)                        |                  |                                          |                                 | Carbon Balance |      |
|---------------------|----------------|-------------------|----------------------------------------|------------------|------------------------------------------|---------------------------------|----------------|------|
|                     |                |                   | C <sub>2</sub> -C <sub>4</sub> Olefins | C <sub>5</sub> + | C <sub>2</sub> -C <sub>4</sub> Paraffins | CH <sub>4</sub> CO <sub>2</sub> |                |      |
| H <sub>2</sub> -350 | H <sub>2</sub> | 10.6              | 19.0                                   | 14.0             | 13.4                                     | 22.5                            | 31.1           | 97.2 |
| H <sub>2</sub> -450 | “              | 9.6               | 21.9                                   | 17.8             | 15.0                                     | 19.1                            | 26.2           | 97.4 |
| H <sub>2</sub> -550 | “              | 8.8               | 24.1                                   | 26.1             | 5.3                                      | 19.6                            | 24.9           | 98.4 |
| H <sub>2</sub> -770 | “              | 3.4               | 28.2                                   | 25.4             | 3.5                                      | 20.0                            | 22.9           | 99.2 |
| CO-300              | CO             | 10.8              | 21.1                                   | 17.6             | 8.9                                      | 37.6                            | 14.8           | 98.0 |
| CO-490              | “              | 8.0               | 15.3                                   | 36.0             | 11.3                                     | 28.1                            | 9.3            | 99.2 |
| CO-750              | “              | 5.5               | 10.0                                   | 18.8             | 12.3                                     | 48.8                            | 10.1           | 99.0 |

Reaction conditions: catalyst mass = 50 mg, temperature = 300 °C, pressure = 300 psig, H<sub>2</sub>/CO = 2, H<sub>2</sub> = 20 ml/min, CO = 10 ml/min, and Ar = 15 ml/min as internal standard.

**Table S2.** Hydrocarbon product selectivity averaged between 9-12 hours on stream of Fe-Na-ZSM-5 pretreated in H<sub>2</sub> or CO at temperatures ranging from 300 -770 °C.

| Catalyst            | Selectivity (%) |           |             |                      |               |        |          |         |        |         |            |        |                             |
|---------------------|-----------------|-----------|-------------|----------------------|---------------|--------|----------|---------|--------|---------|------------|--------|-----------------------------|
|                     | Ethylene        | Propylene | Isobutylene | Cis & Trans-2-butene | 1-3-butadiene | Ethane | 1-butene | Propane | Butane | Pentane | isopentane | Hexane | Unspecified C <sub>5+</sub> |
| H <sub>2</sub> -350 | 3.1             | 9.4       | 0.4         | 1.9                  | 4.1           | 7.8    | -        | 2.9     | 2.6    | 1.1     | 0.2        | 1.0    | 11.7                        |
| H <sub>2</sub> -450 | 4.5             | 10.7      | 0.8         | 4.3                  | 1.6           | 6.6    | -        | 3.4     | 5.1    | 2.5     | -          | 1.3    | 14.0                        |
| H <sub>2</sub> -550 | 7.2             | 10.2      | -           | 5.7                  | 0.7           | 2.2    | 0.3      | 1.1     | 2.0    | 5.5     | 0.3        | 2.0    | 18.3                        |
| H <sub>2</sub> -770 | 8.8             | 10.9      | -           | 7.7                  | 0.7           | 1.7    | 0.1      | 1.0     | 0.8    | 10.7    | 0.2        | 3.0    | 11.5                        |
| CO-300              | 6.1             | 9.3       | -           | 5.0                  | 0.6           | 6.0    | 0.1      | 1.7     | 1.1    | 5.6     | 0.3        | 1.6    | 10.1                        |
| CO-490              | 1.7             | 7.3       | 0.5         | 1.1                  | 4.4           | 5.4    | 0.3      | 2.7     | 3.2    | 3.3     | 0.6        | 1.2    | 30.9                        |
| CO-750              | 1.8             | 5.0       | -           | 2.6                  | 0.4           | 6.5    | 0.2      | 3.1     | 2.5    | 2.1     | 0.5        | 0.6    | 15.6                        |

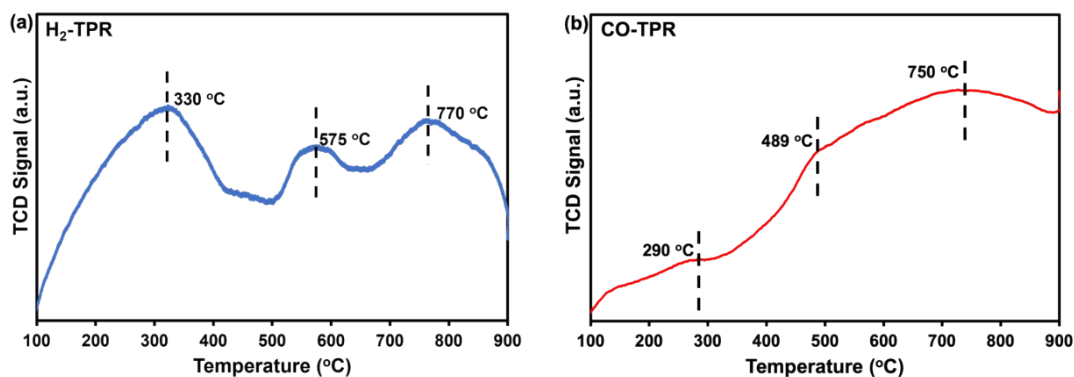

**Figure S1.** Hydrogen temperature programmed reduction, H<sub>2</sub>-TPR (a), and carbon monoxide temperature programmed reduction, CO-TPR (b) of the Fe-Na-ZSM-5 catalyst.

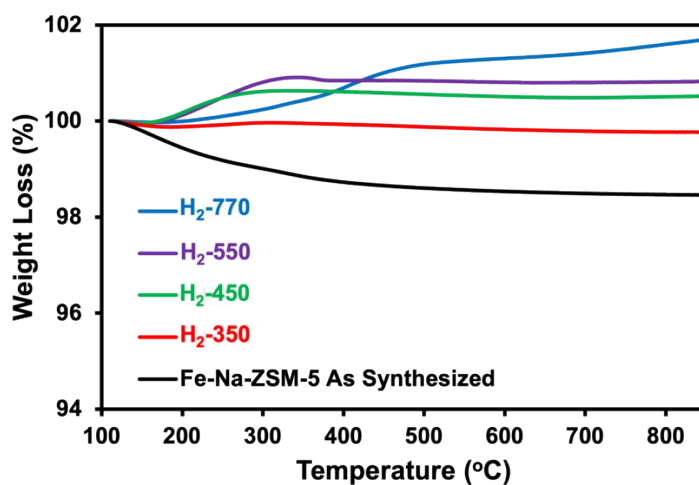

**Figure S2.** Thermogravimetric analysis (TGA) of Fe-Na-ZSM-5 pretreated in H<sub>2</sub>.

**Table S3.** CO Uptake of the Pretreated Fe-Na-ZSM-5 Samples

| Sample              | CO Uptake (μmol/g) |
|---------------------|--------------------|
| H <sub>2</sub> -350 | 12.0               |
| H <sub>2</sub> -450 | 21.5               |
| H <sub>2</sub> -550 | 27.8               |
| H <sub>2</sub> -770 | 10.0               |
| CO-300              | 13.2               |
| CO-490              | 2.3                |
| CO-750              | 7.8                |

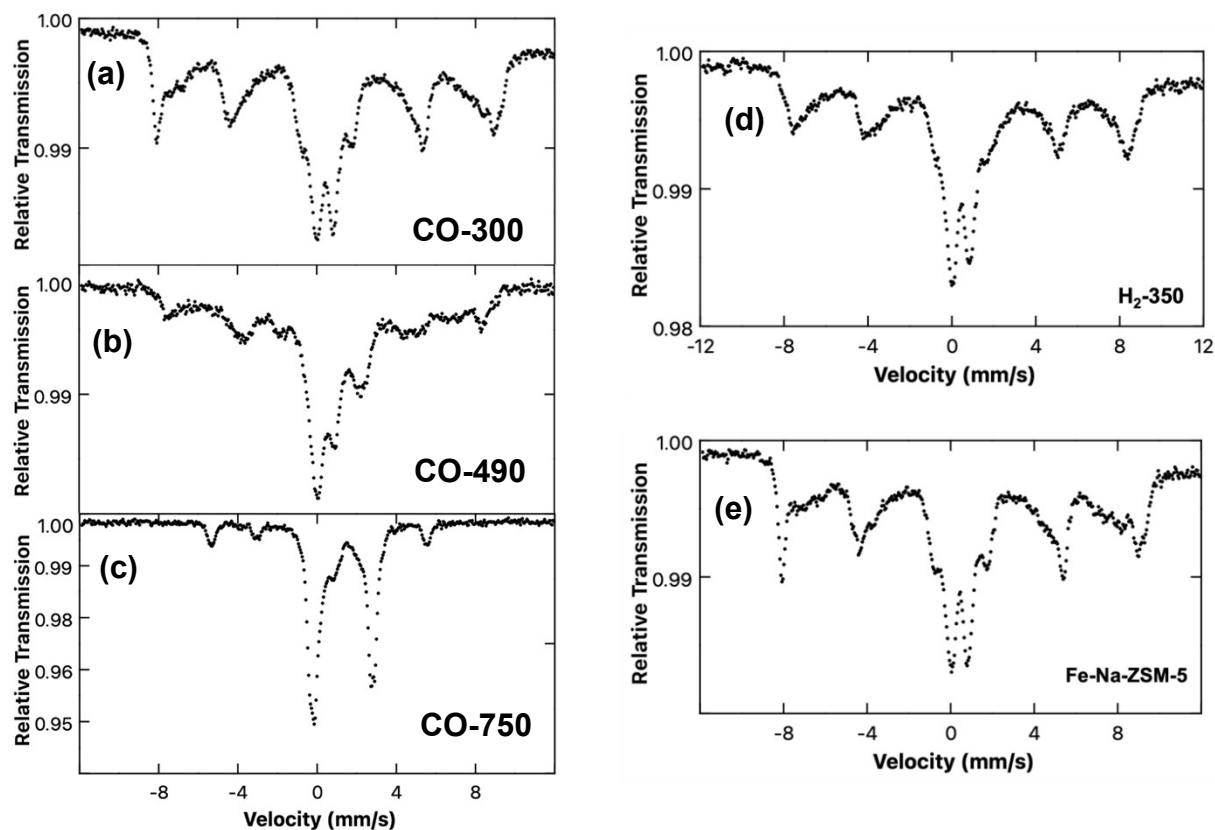

**Figure S3.** Mossbauer spectra of Fe-Na-ZSM-5 pretreated in CO at 300 °C (a), 490 °C (b), 750 °C (c), in H<sub>2</sub> at 350 °C (d), and fresh Fe-Na-ZSM-5 (e).

**Table S4.** Summary of <sup>57</sup>Fe Mössbauer Parameters of Fe-Na-ZSM-5 pretreated in CO at 750 °C.<sup>1-3</sup>

|                       | Fe <sup>2+</sup> | α-Fe | Fe <sub>2</sub> O <sub>3</sub> | Fe-ZSM-5: Fe <sup>2+</sup> oxo |
|-----------------------|------------------|------|--------------------------------|--------------------------------|
| <b>δ</b>              | 1.00             | 0.00 | 0.48                           | 1.26                           |
| <b>ΔE<sub>Q</sub></b> | 1.88             | 0.23 | 0.88                           | 3.04                           |
| <b>FWHM</b>           | 0.50             | 0.41 | 0.45                           | 0.49                           |
| <b>H int (kG)</b>     | -                | 337  | -                              | -                              |
| <b>Area (%)</b>       | 7                | 57   | 12                             | 21                             |

**Table S5.** Summary of  $^{57}\text{Fe}$  Mössbauer Parameters of Fe-Na-ZSM-5 pretreated in  $\text{H}_2$  at 770 °C.

|              | $\text{Fe}^{2+}$ | $\alpha\text{-Fe}$ | $\text{Fe}_2\text{O}_3$ | Fe-ZSM-5: $\text{Fe}^{2+}$ oxo |
|--------------|------------------|--------------------|-------------------------|--------------------------------|
| $\delta$     | 1.00             | 0.00               | 0.48                    | 1.26                           |
| $\Delta E_Q$ | 1.88             | 0.23               | 0.88                    | 3.04                           |
| FWHM         | 0.50             | 0.41               | 0.45                    | 0.49                           |
| H int (kG)   | -                | 337                | -                       | -                              |
| Area (%)     | 9                | 12                 | 20                      | 65                             |

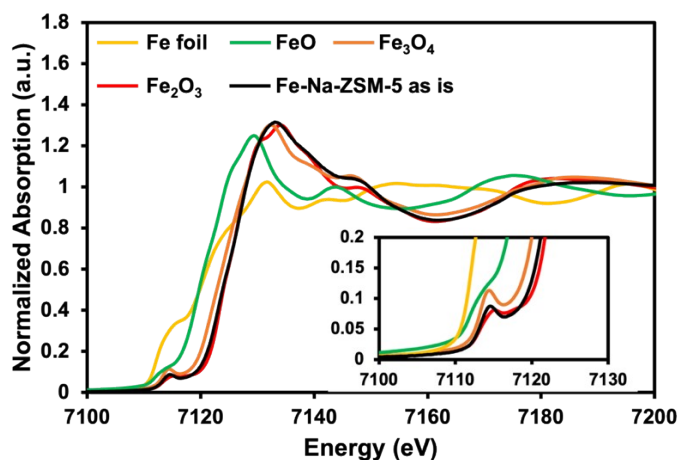

**Figure S4.** Fe K-edge X-ray absorption near-edge structure (XANES) spectra of iron standards: Fe foil, FeO,  $\text{Fe}_3\text{O}_4$ ,  $\text{Fe}_2\text{O}_3$ , and as-synthesized Fe-Na-ZSM-5.

**Table S6.** CO conversion and selectivity averaged between 9-12 hours on stream of Fe-Na-ZSM-5 pretreated in  $\text{H}_2$  or CO at a similar temperature of 300 °C.

| Activation Temp (C) | Activation Gas/flowrate (mL/min) | CO Conversion (%) | Selectivity (%)                 |                 |                                   |               |               | Carbon Balance |
|---------------------|----------------------------------|-------------------|---------------------------------|-----------------|-----------------------------------|---------------|---------------|----------------|
|                     |                                  |                   | $\text{C}_2\text{-C}_4$ Olefins |                 | $\text{C}_2\text{-C}_4$ Paraffins |               |               |                |
|                     |                                  |                   | $\text{C}_2\text{-C}_4$ Olefins | $\text{C}_{5+}$ | $\text{C}_2\text{-C}_4$ Paraffins | $\text{CH}_4$ | $\text{CO}_2$ |                |
| 300                 | CO/20                            | 10.8              | 21.1                            | 17.6            | 8.9                               | 37.6          | 14.8          | 98.0           |
| 300                 | $\text{H}_2$ /40                 | 4.7               | 18.7                            | 17.8            | 15.4                              | 25.2          | 22.9          | 98.8           |

## References

1. Agwara, J. N.; Bakas, N. J.; Neidig, M. L.; Porosoff, M. D., Challenges and Opportunities of Fe - based Core - Shell Catalysts for Fischer - Tropsch Synthesis. *ChemCatChem* **2022**, *14* (19), e202200289.
2. Yang, X.; Wang, R.; Yang, J.; Qian, W.; Zhang, Y.; Li, X.; Huang, Y.; Zhang, T.; Chen, D., Exploring the reaction paths in the consecutive Fe-based FT catalyst–zeolite process for syngas conversion. *ACS Catalysis* **2020**, *10* (6), 3797-3806.
3. Fierro, G.; Moretti, G.; Ferraris, G.; Andreozzi, G. B., A Mössbauer and structural investigation of Fe-ZSM-5 catalysts: Influence of Fe oxide nanoparticles size on the catalytic behaviour for the NO-SCR by C<sub>3</sub>H<sub>8</sub>. *Applied Catalysis B: Environmental* **2011**, *102* (1-2), 215-223.
